# Supplementary material for: Single-cell RNA-sequencing analysis reveals the molecular mechanism of subchondral bone cell heterogeneity in the development of osteoarthritis
Source: bioRxiv or medRxiv preprint supplement (doi:10.1101/2022.03.20.485020), 2022-03-21
Supplement: Supplementary file [file media-1.pdf]

## Supplementary Materials for

### **Single-cell RNA-sequencing analysis reveals the molecular mechanism of subchondral bone cell heterogeneity in the development of osteoarthritis**

Yan Hu<sup>1†</sup>, Jin Cui<sup>2†</sup>, Han Liu<sup>1†</sup>, Sicheng Wang<sup>3†</sup>, Qirong Zhou<sup>2</sup>, Hao Zhang<sup>2</sup>, Jiawei Guo<sup>2</sup>, Liehu Cao<sup>4\*</sup>, Xiao Chen<sup>2\*</sup>, Ke Xu<sup>1\*</sup>, Jiacan Su<sup>1,2\*</sup>

\*Corresponding author. Email: traumahu@163.com (L.H.C.); sirchenxiao@126.com (X.C.); kexu@shu.edu.cn (K.X.); drsujiacan@163.com (J.C.S.)

#### **This PDF file includes:**

Figs. S1 to S10  
Tables S1 to S2

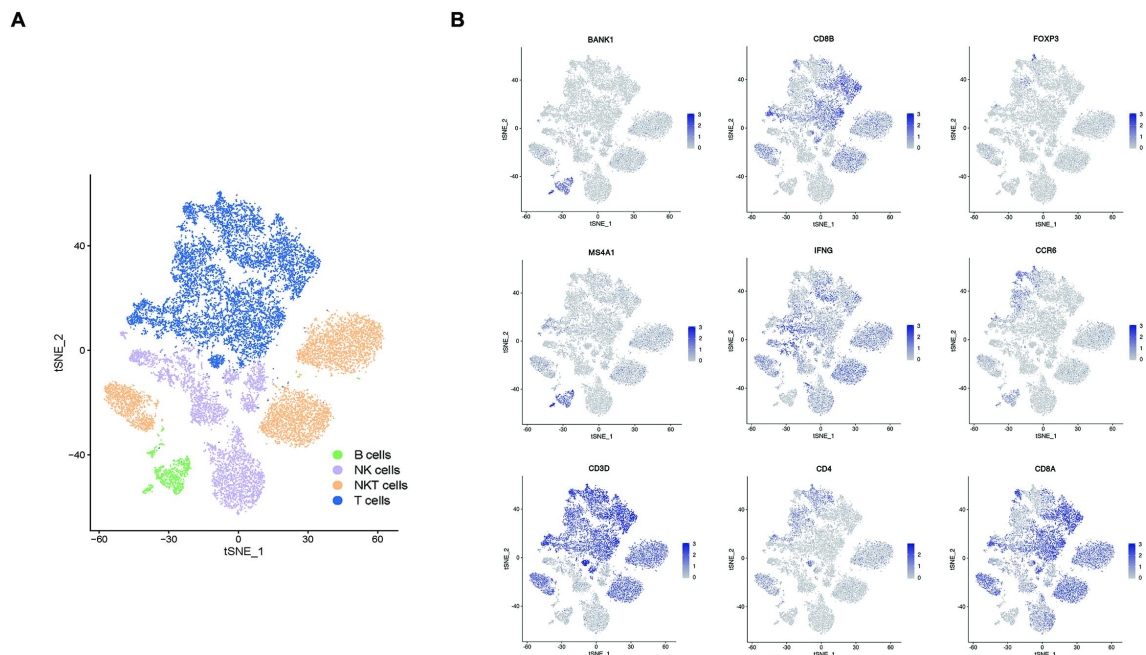

**Fig. S1. Single-cell profiling of human OA subchondral bone immune cells. (A)** t-SNE plots of Immune cells colored by cluster. **(B)** Dot plots showing the expression of indicated markers for each cell types on the t-SNE map.

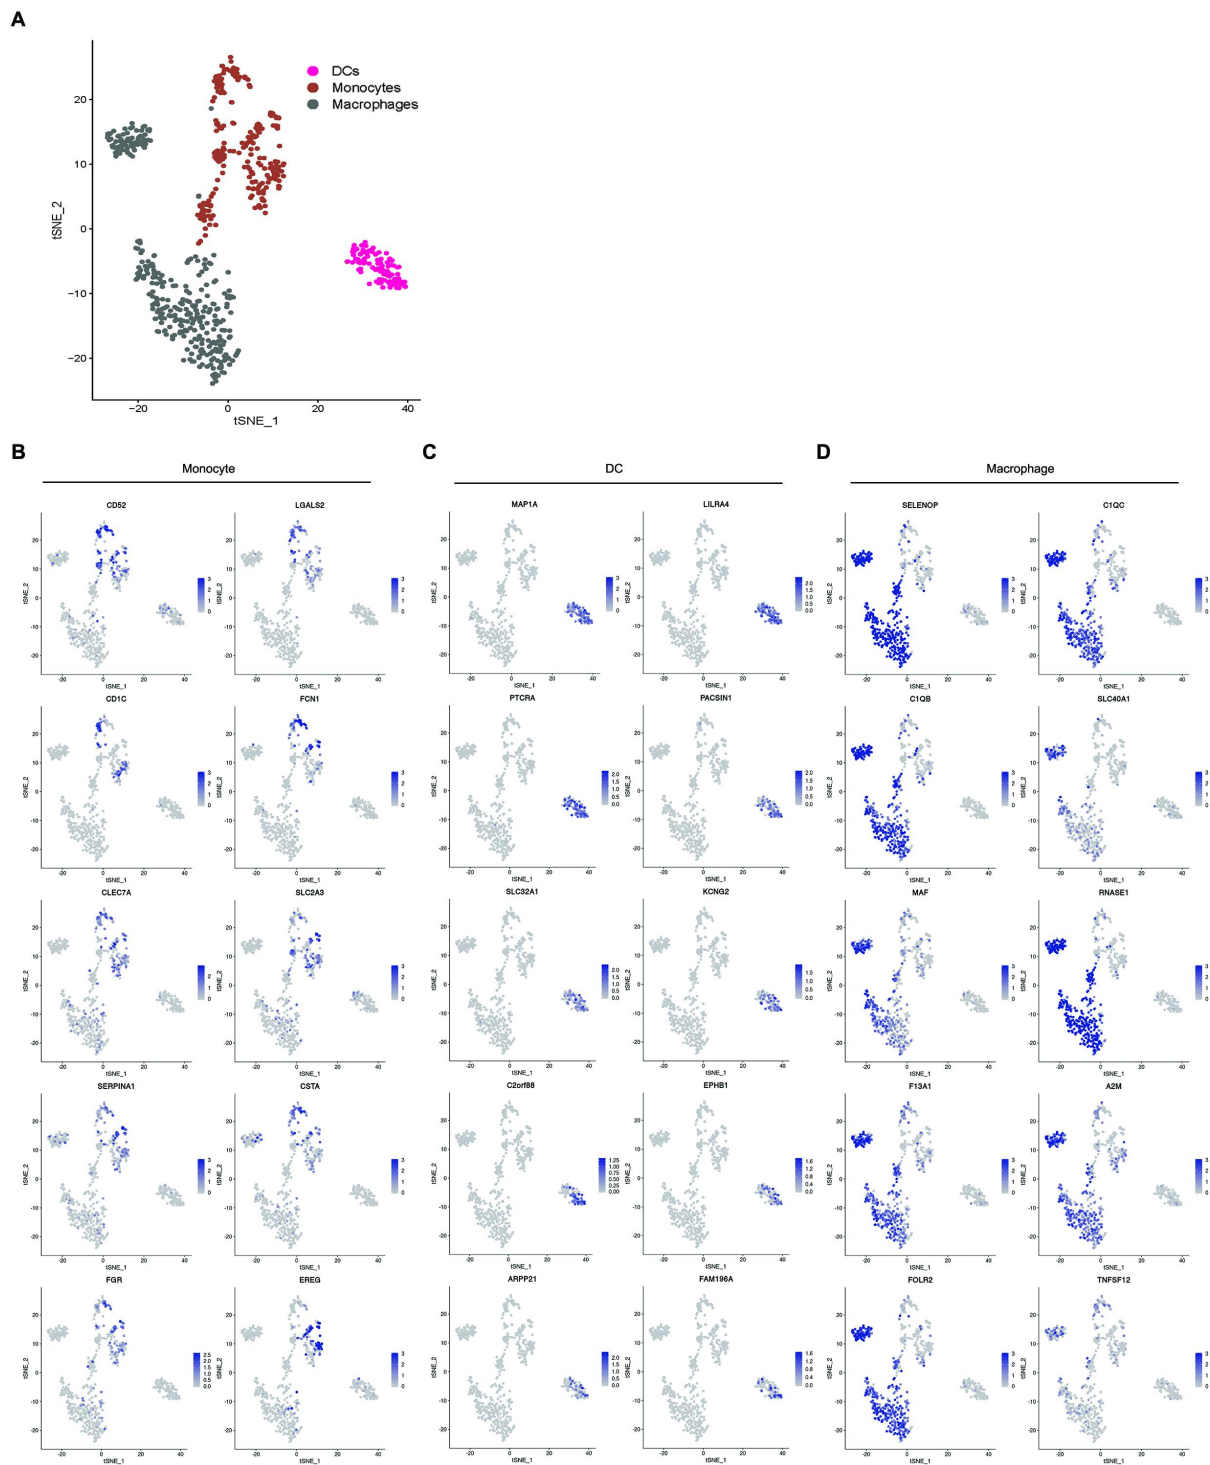

**Fig. S2. Single-cell profiling of human OA subchondral bone myeloid cells. (A)** t-SNE plots of myeloid cells colored by cluster. **(B-D)** Dot plots showing the expression of indicated markers for each cell types on the t-SNE map.

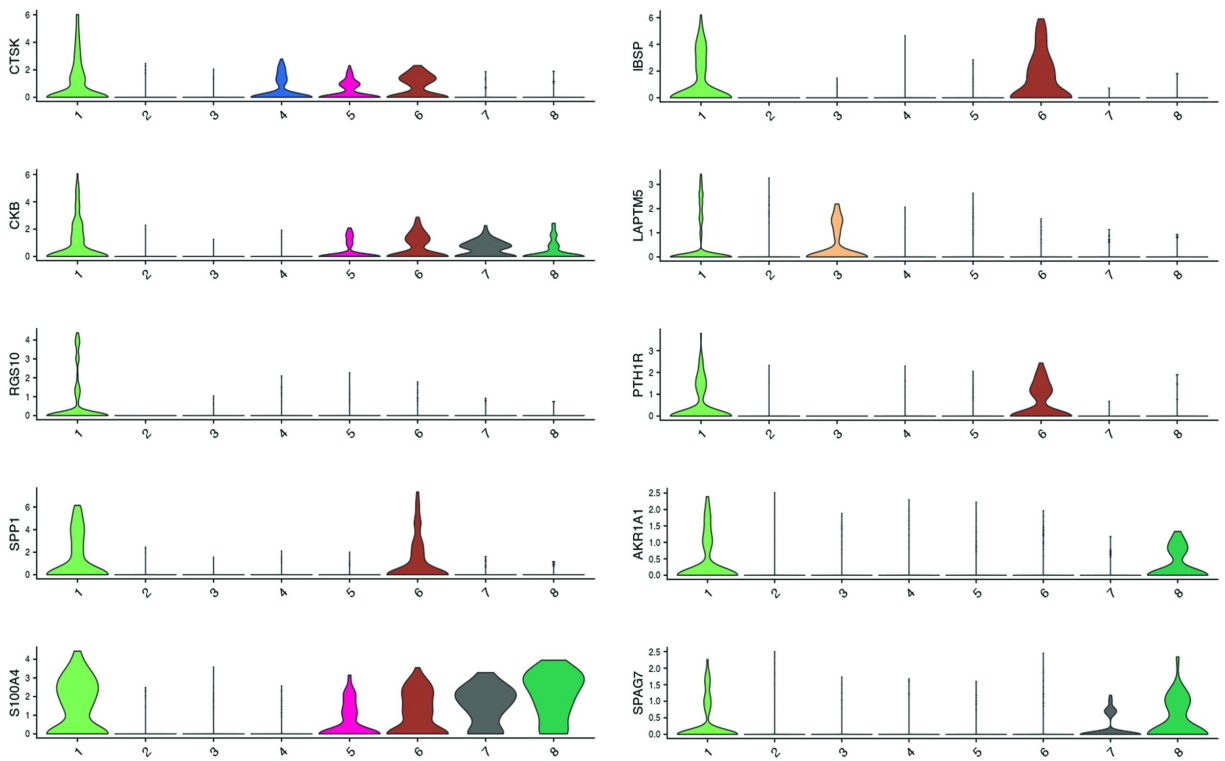

**Fig. S3. Violin plots showing expression levels of indicated markers for Cluster 1**

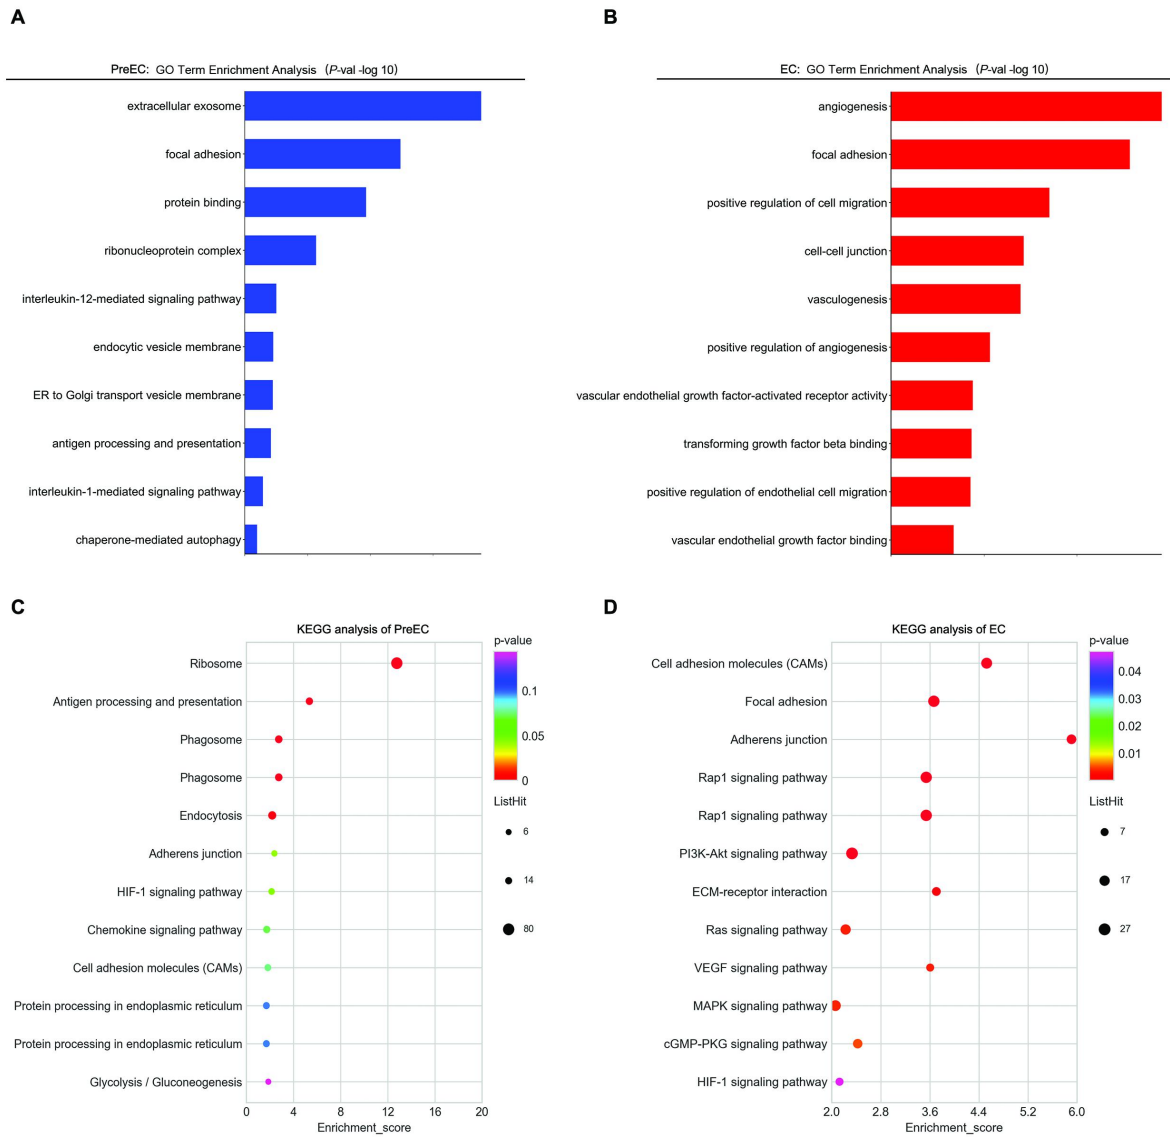

**Fig. S4. Identification of Pre-ECs and ECs.** (A) Enriched GO functions of upregulated genes in Pre-ECs. (B) Enriched GO functions of upregulated genes in ECs. (C) Enrichment plot from KEGG pathway analysis for Pre-ECs. (D) Enrichment plot from KEGG pathway analysis for ECs. Type or paste caption here. Create a page break and paste in the Figure above the caption.

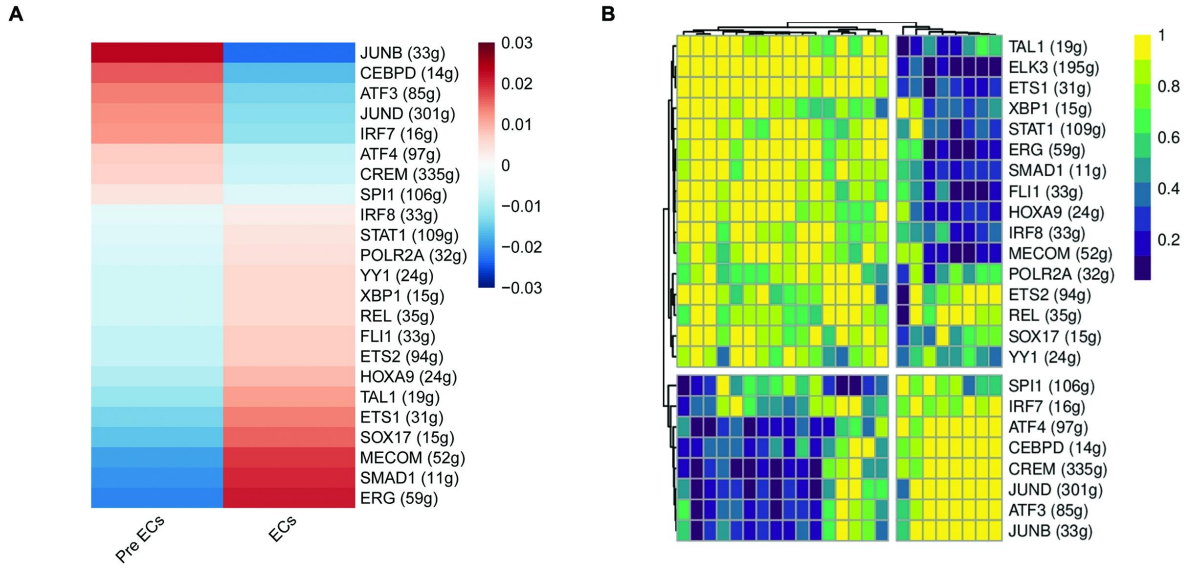

**Fig. S5. The difference between Pre-ECs and ECs in transcriptional regulation.** Single-cell regulatory network inference and clustering (SCENIC) analysis showing distinct regulons between ECs and Pre-ECs. The heatmap listing only the regulons with significant differences.

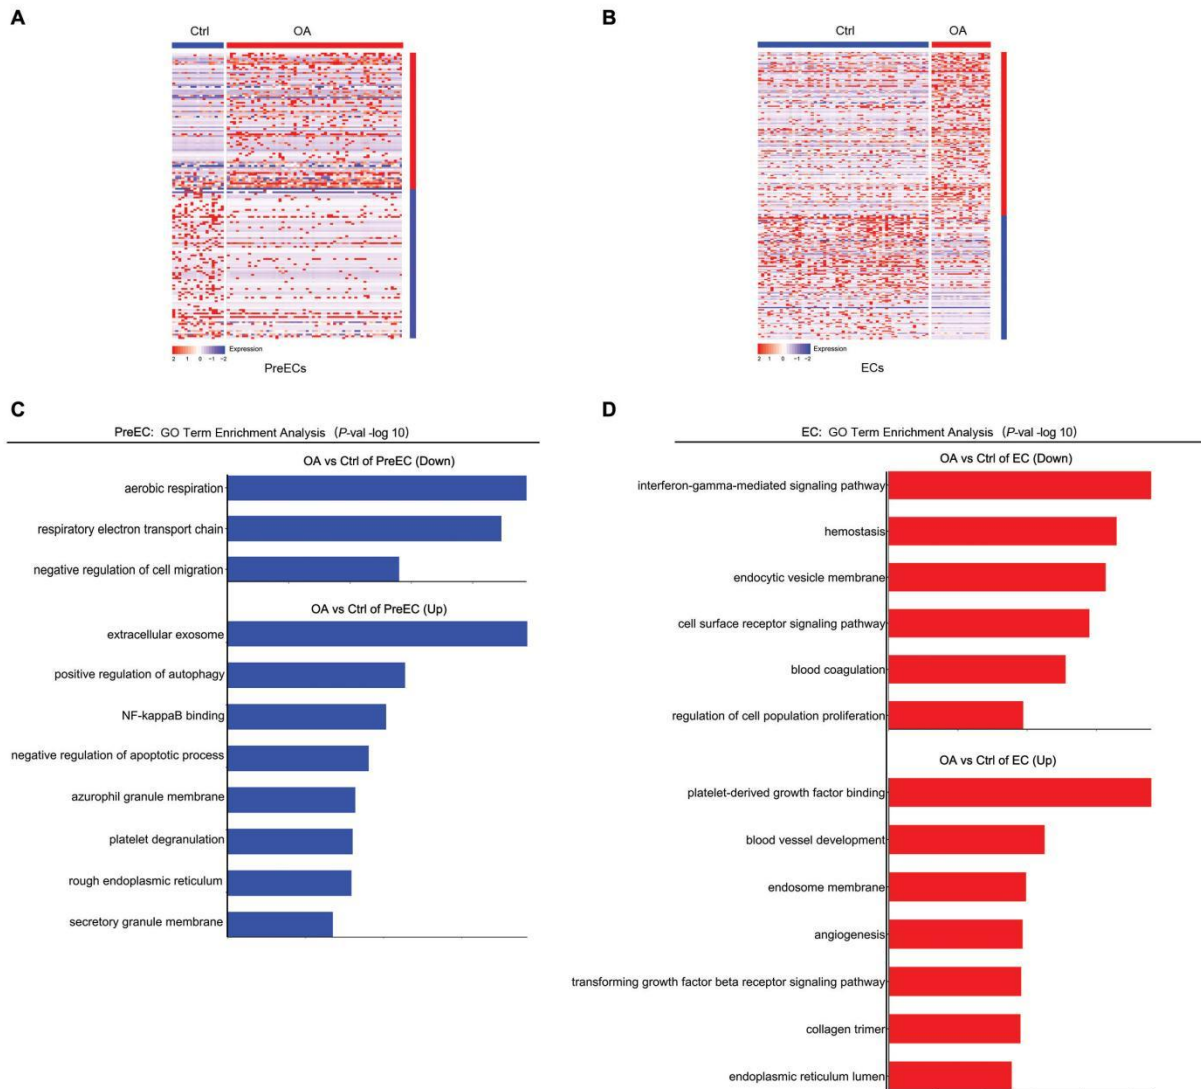

**Fig. S6. Identification of OA group and Ctrl group in endothelial cells. (A)**Heatmap of DEGs between OA group and Ctrl group in Pre-ECs and ECs. **(B)**GO functions enrichment analysis of OA versus ctrl upregulated genes in Pre-ECs and ECs

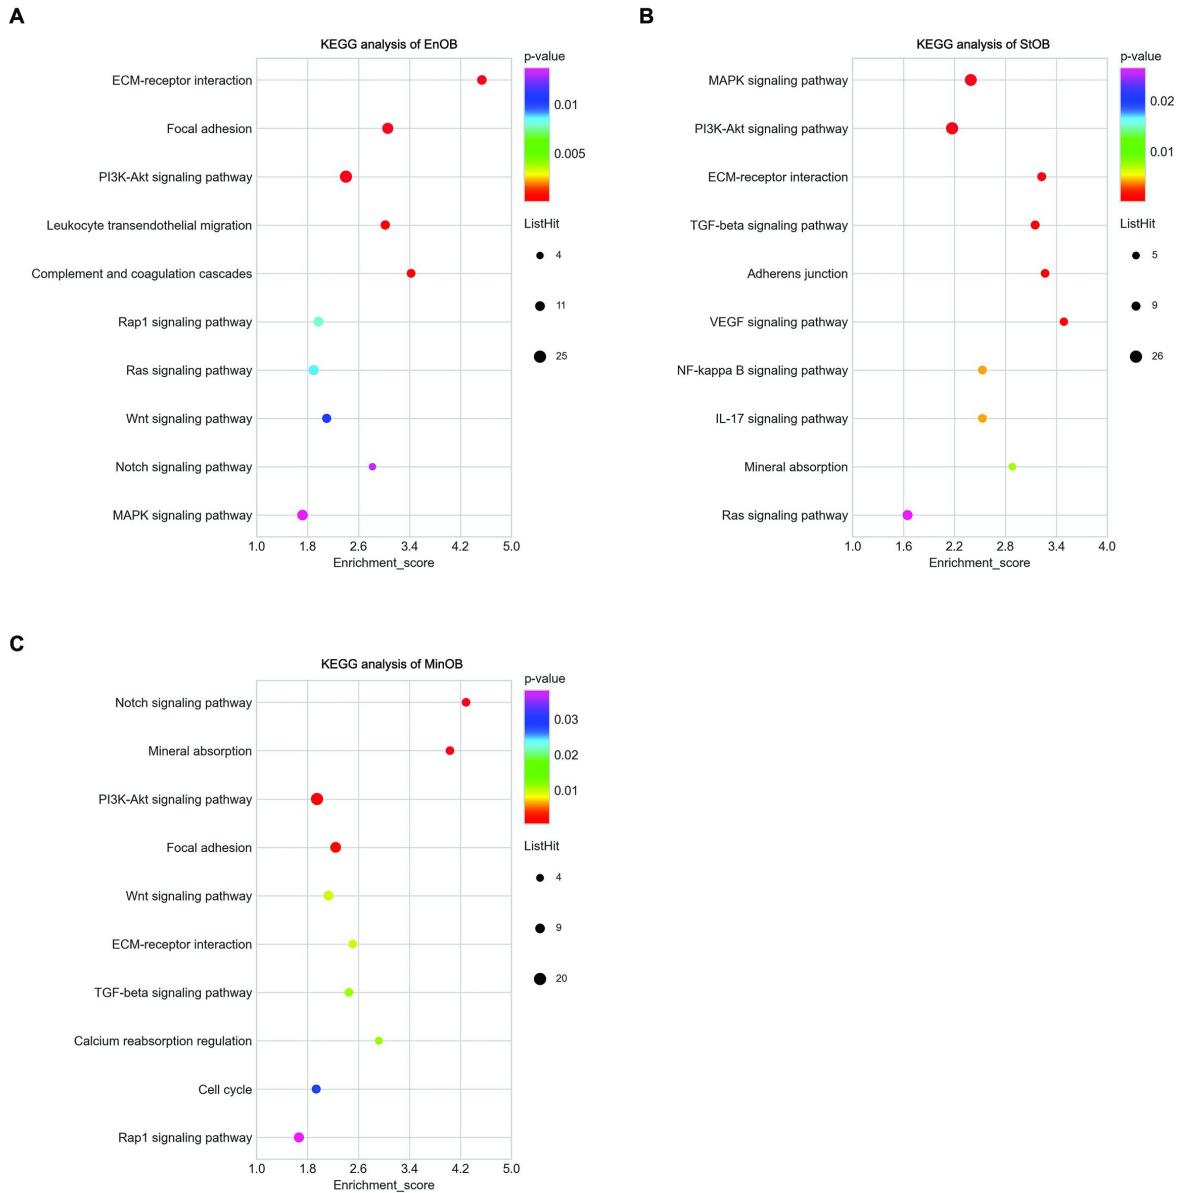

**Fig. S7. KEGG showing enrichment of pathways among EnOBs, StOBs and MinOBs. (A)Enrichment plot from KEGG pathway analysis for EnOBs. (B)Enrichment plot from KEGG pathway analysis for StOBs. (C)Enrichment plot from KEGG pathway analysis for MinOBs**



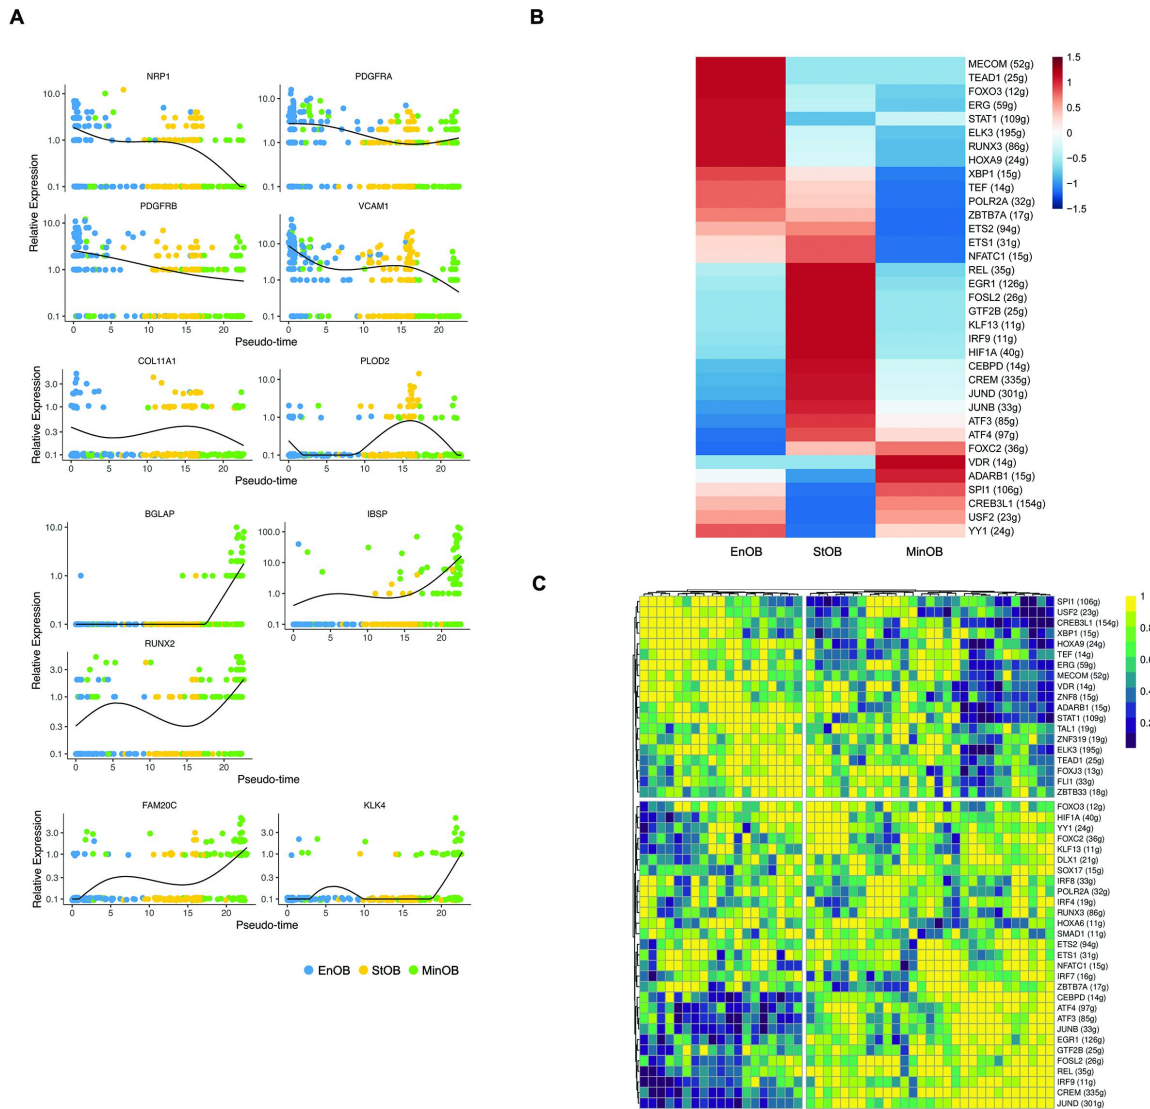

**Fig. S8. Identification of EnOB, StOB and MinOB.** (A) Pseudotemporal expression dynamics of marker gene in EnOBs, StOBs and MinOBs. All single cells in the EnOBs, StOBs and MinOBs cell lineage are ordered based on pseudotime. (B-C) Single-cell regulatory network inference and clustering (SCENIC) analysis showing distinct regulons among EnOBs, StOBs and MinOBs. The heatmap listing only the regulons with significant differences.

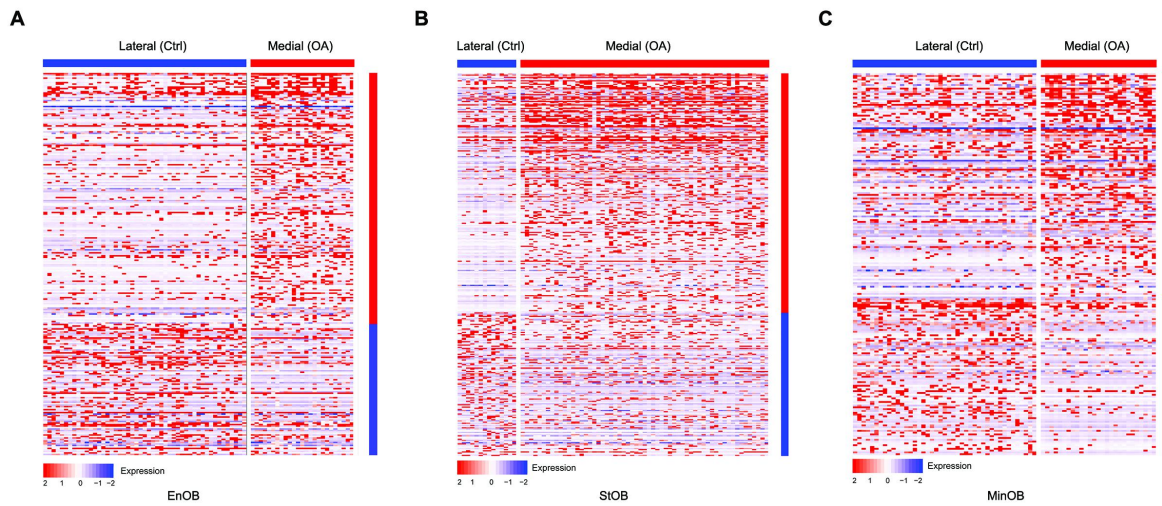

**Fig. S9. Identification of OA group and Ctrl group in osteoblasts.** (A) Heatmap of DEGs between OA group and Ctrl group in EnOBs. (B) Heatmap of DEGs between OA group and Ctrl group in StOBs. (C) Heatmap of DEGs between OA group and Ctrl group in MinOBs

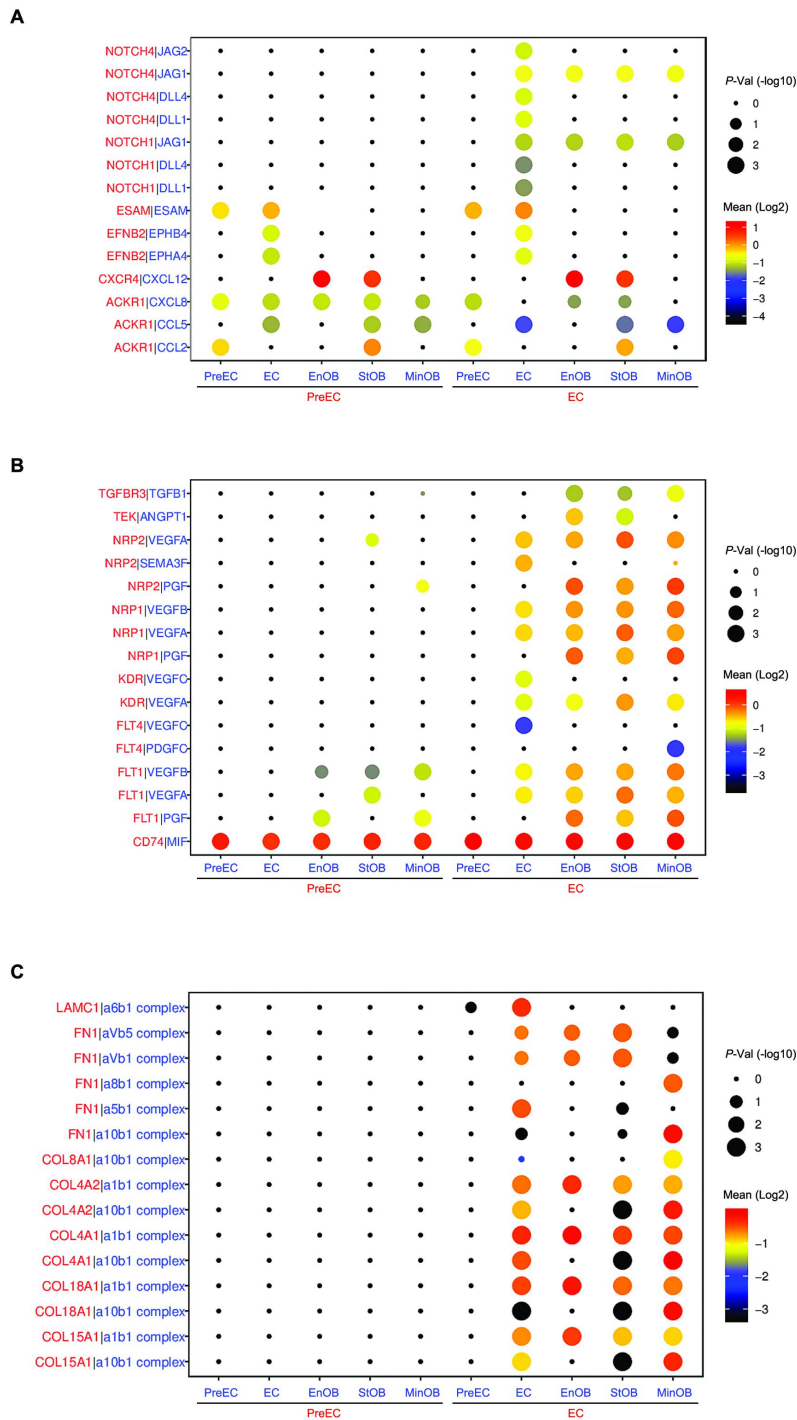

**Fig. S10. Vascular endothelial cell and osteoblast subtype interaction.** CellPhoneDB analysis showing the number of ligand-receptor interactions between endothelial cell subpopulation and osteoblast subpopulation. Bubble plots show ligand-receptor pairs of cytokines (A), growth factors (B) and integrin (C) between endothelial cells subpopulation.

**Table S1. Clinical and demographic characteristics of the patients**

|                       | Patient 1               | Patient 2                                   |
|-----------------------|-------------------------|---------------------------------------------|
| Gender                | Female                  | Female                                      |
| Age<br>(years)        | 74                      | 72                                          |
| BMI                   | 26.89                   | 29.14                                       |
| TKA                   | Right                   | Left                                        |
| KSS score             | 54                      | 58                                          |
| Chronic<br>conditions | Hypertension (grade II) | Type 2 diabetes, hypertension<br>(grade I ) |

**Table S2. Markers of each cell type**

| Cell type  | Markers                        |
|------------|--------------------------------|
| B cell     | CD79A, BANK1, MS4A1            |
| NK cell    | GZMB, NKG7                     |
| NKT cell   | NKG7, CD3D                     |
| T cell     | CD3D, CD3G                     |
| DC         | LILRA4, PTCRA                  |
| Monocyte   | CSTA, FCN1                     |
| Macrophage | CD14, CD68, CSF1R, C1QC, F13A1 |
| EC         | PECAM1, CLDN5                  |
| MSC        | MCAM                           |
| OB         | RUNX2, CDH11                   |
